# Supplementary material for: Melamine sensing through riboflavin stabilized gold nanoparticles
Source: Royal Society of Chemistry journal article supplement (doi:10.1039/c0an00599a), 2010-10-13
Supplement: c0an00599a.pdf [file c0an00599a.pdf]

Supplementary Material (ESI) for Analyst  
This journal is © The Royal Society of Chemistry 2010

## **Electronic Supporting information**

### **Melamine sensing through riboflavin stabilized gold nanoparticles**

Bappaditya Roy, Abhijit Saha and Arun K. Nandi\*

Polymer Science Unit, Indian Association for the Cultivation of Science

Jadavpur, Kolkata-700 032, India

---

\*for correspondence, email: [psuakn@iacs.res.in](mailto:psuakn@iacs.res.in)

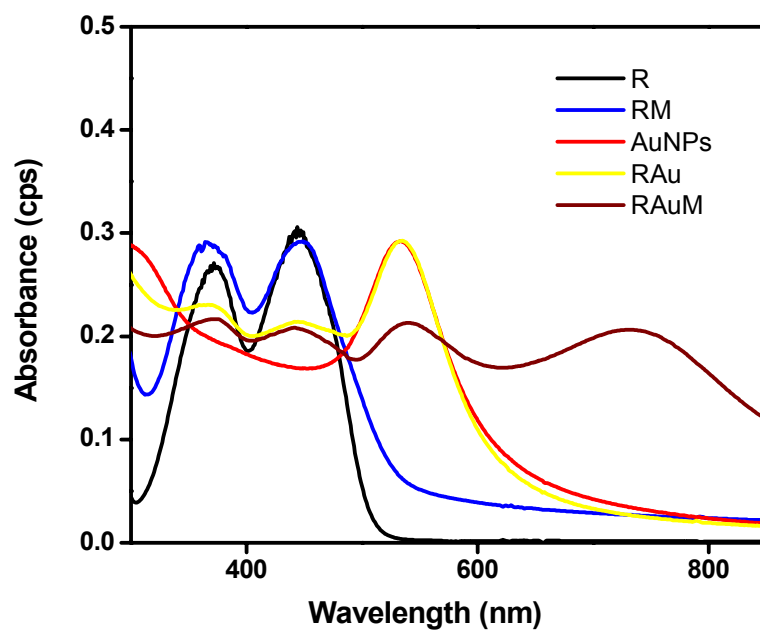

**Fig. S1:** UV-vis spectra of pure R, RM, Au NPs, R-Au NPs and melamine sensed R-Au NPs (RAuM).

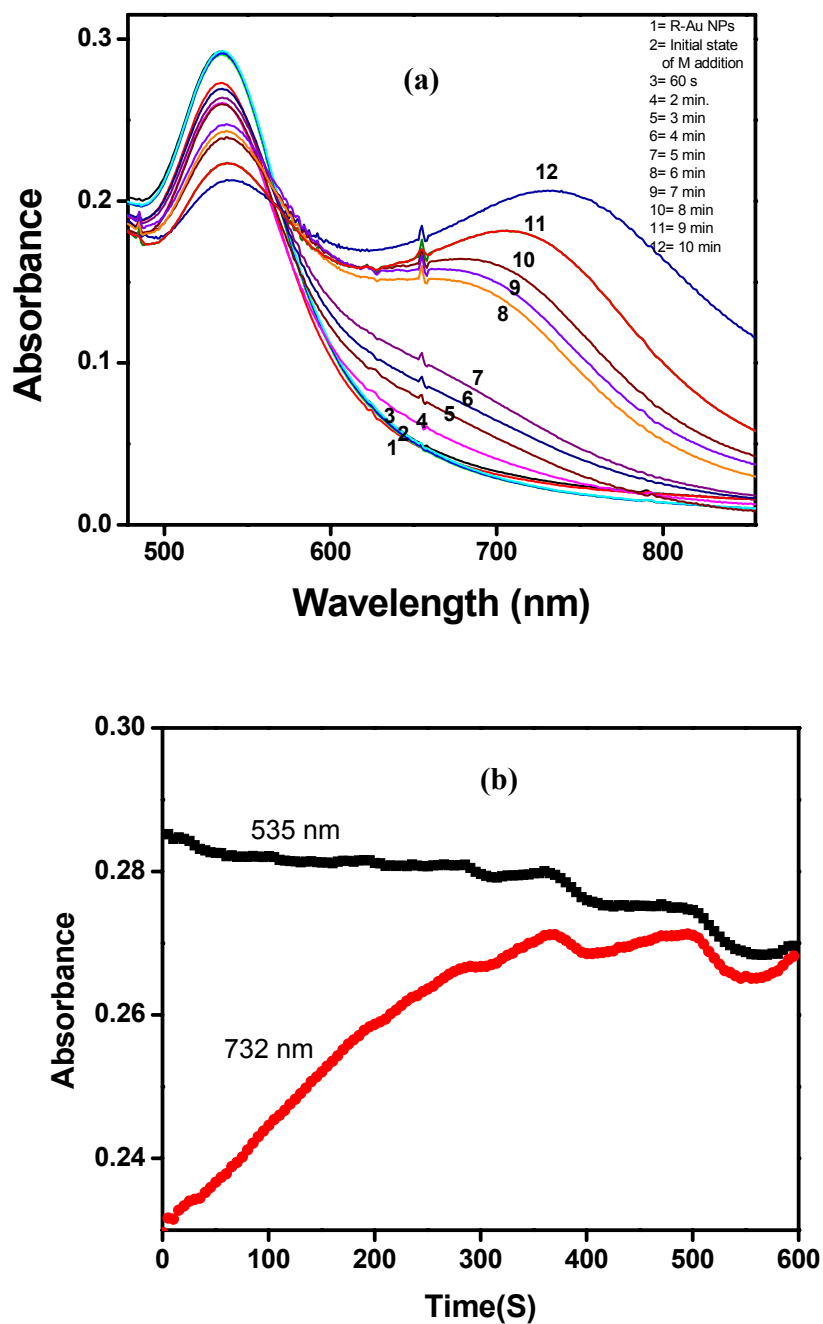

**Fig. S2:** (a) Absorbance spectra of R-Au NP ( Au Np = 1  $\mu$ M and R=7.5  $\mu$ M). containing 2  $\mu$ M M at 30  $^{\circ}$ C with indicated times. (b) Intensity of UV-vis peaks  $\lambda_{\max}$  = 535 and 732 nm vs time plot from fig. S2(a).

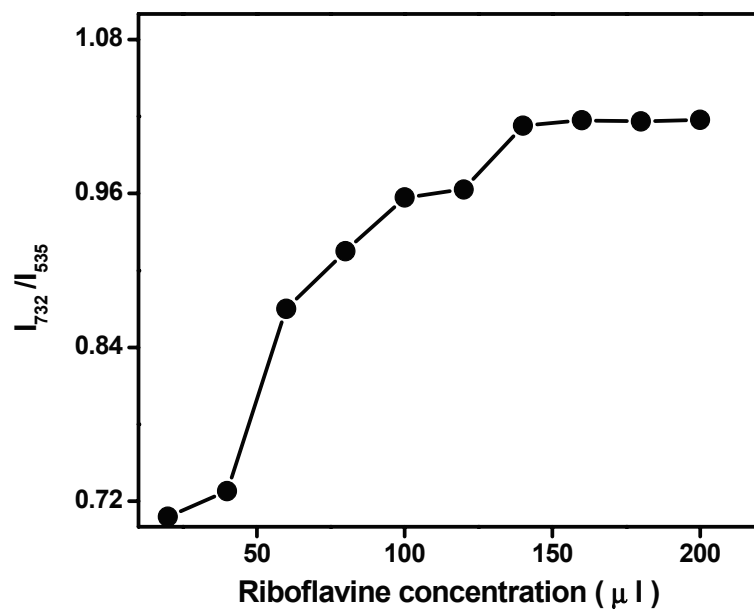

**Figure S3:** Ratio of peak intensity ( $I_{732}/I_{535}$ ) vs riboflavin concentration with same concentration of Au NPs and melamine (1  $\mu M$ ).

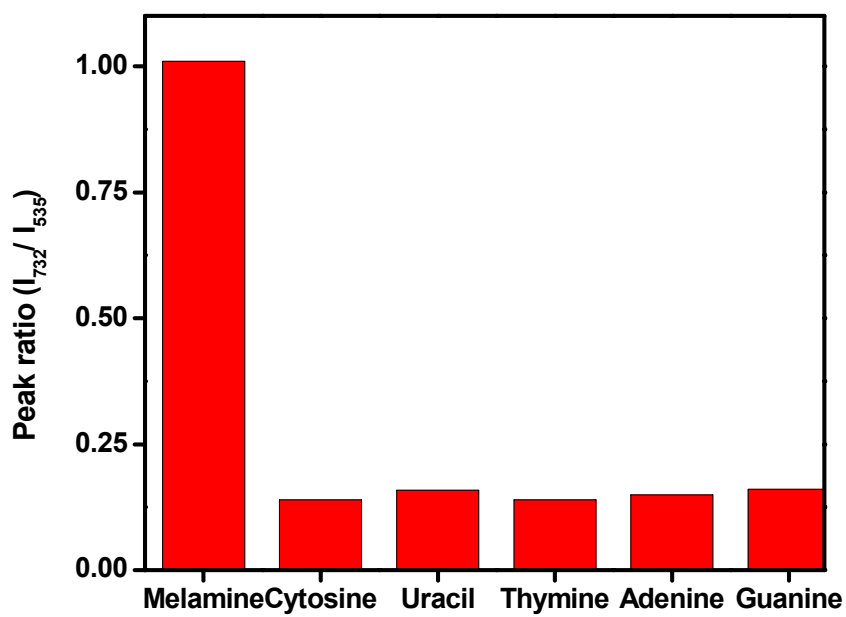

**Figure S4:** The selectivity of the optimized sensor for melamine in presence of different pyrimidine and purine molecules under similar condition.

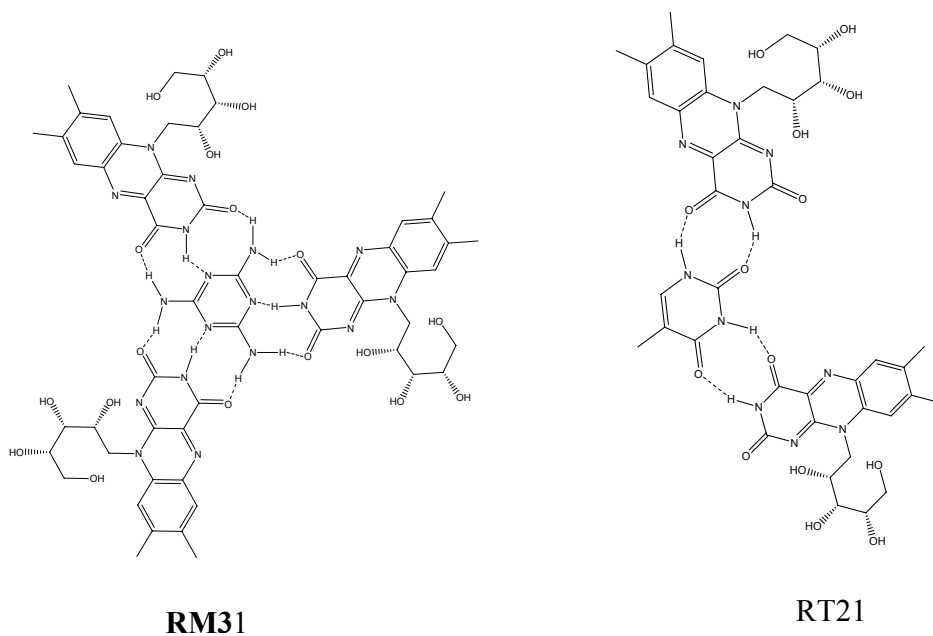

**Figure S5:** Comparison of H-bonding degree of R with melamine (RM31) and thymine (RT21).
